# Supplementary figures and images for: Synaptotagmin-1 is the Ca2+ sensor for fast striatal dopamine release
Source: eLife journal article supplement (doi:10.7554/elife.58359), 2020-06-03

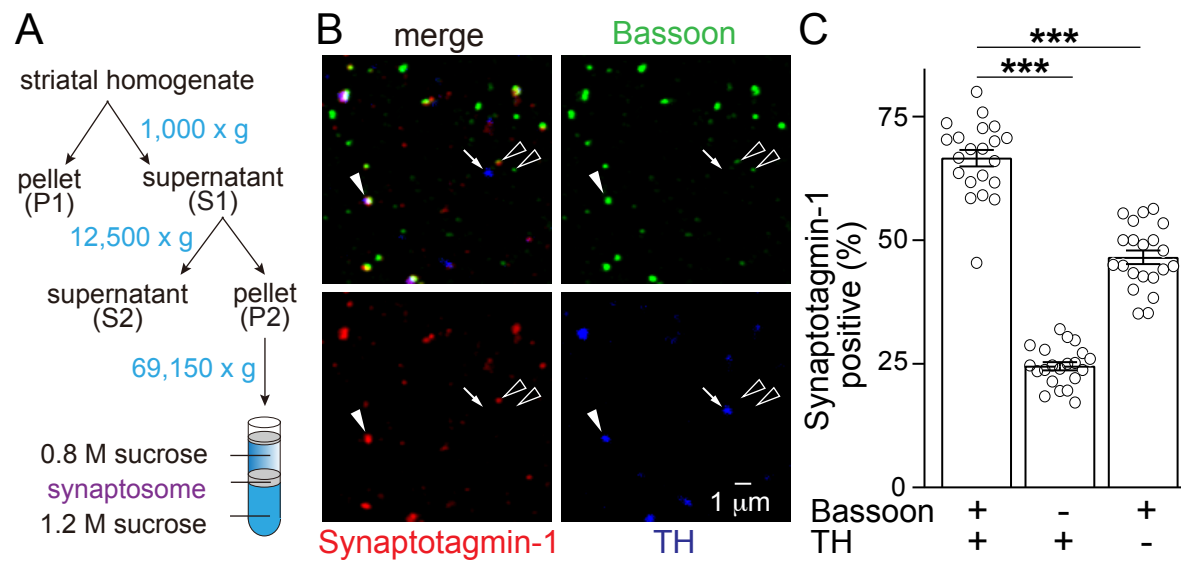

Banerjee et al., Figure 1 - figure supplement 2

Supplement: supp [file elife-58359-supp-v1.zip]

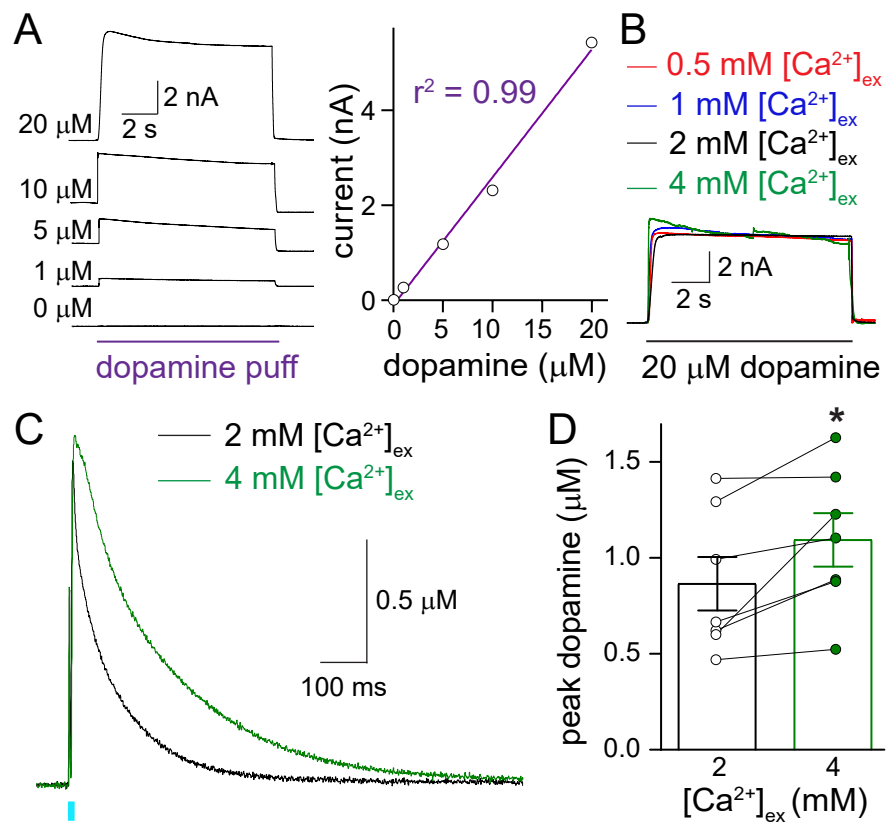

Banerjee et al., Figure 1 - figure supplement 1

Supplement: supp [file elife-58359-supp-v1.zip]

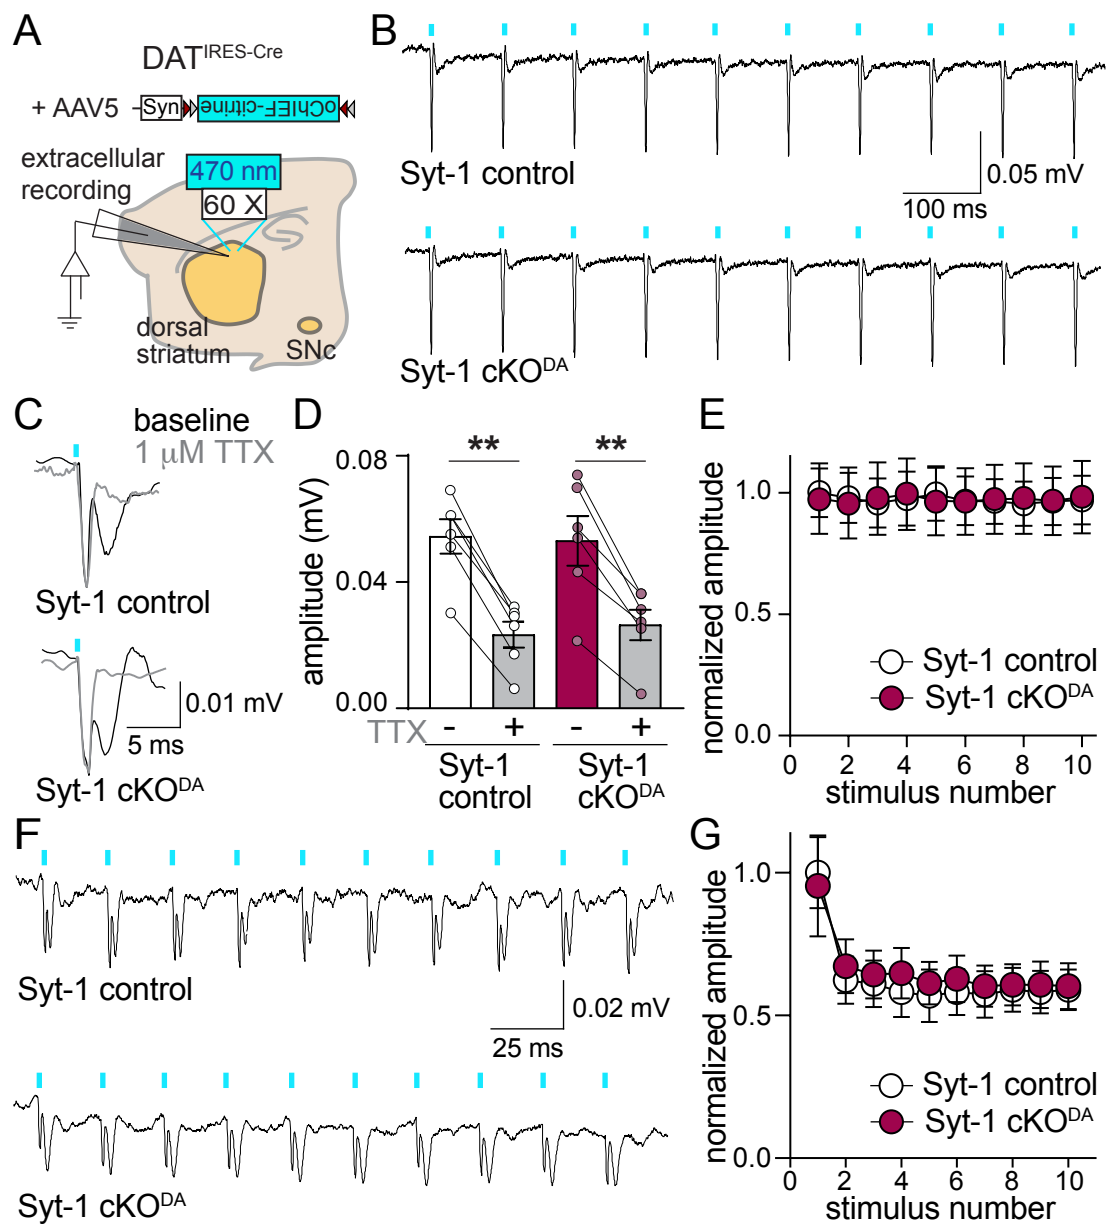

Banerjee et al., Figure 1 - figure supplement 3

Supplement: supp [file elife-58359-supp-v1.zip]

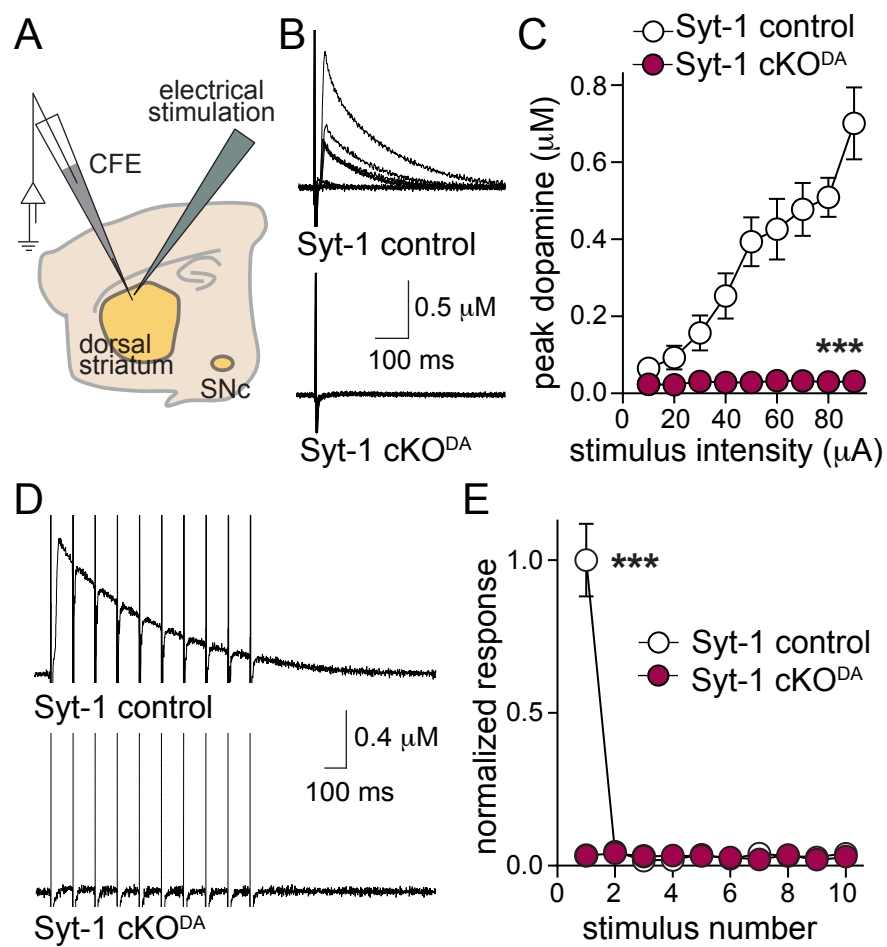

Banerjee et al., Fig. 1 – figure supplement 4

Supplement: supp [file elife-58359-supp-v1.zip]
